# Supplementary material for: The Latoia consocia Caterpillar Induces Pain by Targeting Nociceptive Ion Channel TRPV1
Source: MDPI journal article supplement (doi:10.3390/toxins11120695), 2019-11-27
Supplement: s1 [file s1]

## Supplementary Materials: The *Latoia consocia* Caterpillar Induces Pain by Targeting Nociceptive Ion Channel TRPV1

Zhihao Yao, Peter Muiruri Kamau, Yalan Han, Jingmei Hu, Anna Luo, Lei Luo, Jie Zheng, Yuhua Tian and Ren Lai

**Table 1.** Defense mechanism-related genes found in *Latoia consocia* venom transcriptome.

| Number | Gene ID                  | Description                                        |
|--------|--------------------------|----------------------------------------------------|
| 1      | TRINITY_DN83048_c1_g4_i3 | Defense mechanisms                                 |
| 2      | TRINITY_DN74008_c0_g2_i1 | Defense mechanisms                                 |
| 3      | TRINITY_DN80791_c0_g4_i2 | Signal transduction mechanisms; Defense mechanisms |
| 4      | TRINITY_DN73676_c0_g1_i1 | Extracellular structures; Defense mechanisms       |
| 5      | TRINITY_DN77222_c0_g1_i1 | Lipid transport and metabolism; Defense mechanisms |
| 6      | TRINITY_DN83852_c1_g1_i7 | Signal transduction mechanisms; Defense mechanisms |
| 7      | TRINITY_DN79170_c2_g5_i1 | Signal transduction mechanisms; Defense mechanisms |
| 8      | TRINITY_DN53275_c0_g1_i1 | Signal transduction mechanisms; Defense mechanisms |
| 9      | TRINITY_DN80054_c2_g3_i1 | Defense mechanisms                                 |
| 10     | TRINITY_DN76642_c2_g2_i2 | Signal transduction mechanisms; Defense mechanisms |
| 11     | TRINITY_DN75255_c0_g3_i1 | Defense mechanisms                                 |
| 12     | TRINITY_DN72565_c0_g1_i1 | Signal transduction mechanisms; Defense mechanisms |
| 13     | TRINITY_DN82244_c0_g1_i1 | Defense mechanisms                                 |
| 14     | TRINITY_DN80536_c0_g1_i1 | Defense mechanisms                                 |
| 15     | TRINITY_DN66984_c0_g1_i1 | Defense mechanisms                                 |
| 16     | TRINITY_DN81172_c0_g1_i1 | Signal transduction mechanisms; Defense mechanisms |
| 17     | TRINITY_DN79838_c3_g5_i1 | Defense mechanisms                                 |
| 18     | TRINITY_DN84195_c3_g1_i1 | Defense mechanisms                                 |
| 19     | TRINITY_DN78131_c0_g2_i4 | Defense mechanisms                                 |

---

|    |                          |                                                                                                                     |
|----|--------------------------|---------------------------------------------------------------------------------------------------------------------|
| 20 | TRINITY_DN83853_c3_g2_i7 | Defense mechanisms                                                                                                  |
| 21 | TRINITY_DN83643_c1_g3_i1 | Defense mechanisms                                                                                                  |
| 22 | TRINITY_DN83475_c0_g2_i2 | Signal transduction mechanisms; Defense mechanisms                                                                  |
| 23 | TRINITY_DN83048_c1_g1_i6 | Defense mechanisms                                                                                                  |
| 24 | TRINITY_DN84195_c3_g4_i3 | Defense mechanisms                                                                                                  |
| 25 | TRINITY_DN84767_c1_g1_i3 | Defense mechanisms                                                                                                  |
| 26 | TRINITY_DN80385_c0_g1_i2 | Defense mechanisms                                                                                                  |
| 27 | TRINITY_DN80524_c0_g3_i1 | Signal transduction mechanisms; Defense mechanisms                                                                  |
| 28 | TRINITY_DN83475_c0_g1_i4 | Signal transduction mechanisms; Defense mechanisms                                                                  |
| 29 | TRINITY_DN81998_c0_g3_i1 | Extracellular structures; Defense mechanisms                                                                        |
| 30 | TRINITY_DN75666_c3_g1_i5 | Defense mechanisms                                                                                                  |
| 31 | TRINITY_DN82110_c0_g1_i6 | Signal transduction mechanisms; Posttranslational modification,<br>protein turnover, chaperones; Defense mechanisms |
|    |                          | Signal transduction mechanisms; Defense mechanisms                                                                  |
| 32 | TRINITY_DN81269_c5_g2_i1 | Defense mechanisms                                                                                                  |
| 33 | TRINITY_DN77014_c1_g1_i2 | Extracellular structures; Defense mechanisms                                                                        |
| 34 | TRINITY_DN77967_c3_g1_i1 | Defense mechanisms                                                                                                  |
| 35 | TRINITY_DN34547_c0_g1_i1 | Signal transduction mechanisms; Defense mechanisms                                                                  |
| 36 | TRINITY_DN80253_c0_g2_i3 | Defense mechanisms                                                                                                  |
| 37 | TRINITY_DN67500_c0_g2_i2 | Signal transduction mechanisms; Defense mechanisms                                                                  |
| 38 | TRINITY_DN72730_c0_g1_i2 | Defense mechanisms                                                                                                  |
| 39 | TRINITY_DN78572_c1_g3_i8 | Defense mechanisms                                                                                                  |
| 40 | TRINITY_DN79935_c1_g1_i2 | Signal transduction mechanisms; Defense mechanisms                                                                  |
| 41 | TRINITY_DN76265_c1_g1_i1 | Signal transduction mechanisms; Defense mechanisms                                                                  |
| 42 | TRINITY_DN82697_c3_g6_i2 | Signal transduction mechanisms; Defense mechanisms                                                                  |
| 43 | TRINITY_DN79170_c2_g3_i1 | Extracellular structures; Defense mechanisms                                                                        |

---

---

|    |                           |                                                    |
|----|---------------------------|----------------------------------------------------|
| 44 | TRINITY_DN73206_c0_g1_i2  | Defense mechanisms                                 |
| 45 | TRINITY_DN82297_c5_g2_i1  | Defense mechanisms                                 |
| 46 | TRINITY_DN79000_c0_g1_i1  | Defense mechanisms                                 |
| 47 | TRINITY_DN76231_c0_g1_i5  | Defense mechanisms                                 |
| 48 | TRINITY_DN74127_c0_g1_i2  | Defense mechanisms                                 |
| 49 | TRINITY_DN82984_c4_g1_i2  | Defense mechanisms                                 |
| 50 | TRINITY_DN83795_c3_g1_i2  | Defense mechanisms                                 |
| 51 | TRINITY_DN75743_c0_g5_i1  | Signal transduction mechanisms; Defense mechanisms |
| 52 | TRINITY_DN83261_c2_g2_i12 | Signal transduction mechanisms; Defense mechanisms |
| 53 | TRINITY_DN81172_c1_g1_i2  | Defense mechanisms                                 |
| 54 | TRINITY_DN73759_c0_g1_i1  | Signal transduction mechanisms; Defense mechanisms |
| 55 | TRINITY_DN75176_c8_g3_i1  | Extracellular structures; Defense mechanisms       |
| 56 | TRINITY_DN85012_c3_g3_i1  | Signal transduction mechanisms; Defense mechanisms |
| 57 | TRINITY_DN77013_c0_g1_i2  | Signal transduction mechanisms; Defense mechanisms |
| 58 | TRINITY_DN74738_c0_g1_i1  | Signal transduction mechanisms; Defense mechanisms |
| 59 | TRINITY_DN75786_c3_g3_i1  | Extracellular structures; Defense mechanisms       |
| 60 | TRINITY_DN71515_c0_g1_i1  | Defense mechanisms                                 |
| 61 | TRINITY_DN71223_c0_g1_i1  | Defense mechanisms                                 |
| 62 | TRINITY_DN75742_c4_g1_i2  | Signal transduction mechanisms; Defense mechanisms |
| 63 | TRINITY_DN80253_c0_g4_i1  | Defense mechanisms                                 |
| 64 | TRINITY_DN12228_c0_g1_i1  | Defense mechanisms                                 |
| 65 | TRINITY_DN67666_c0_g2_i1  | Cell wall/membrane biogenesis; Defense mechanisms  |
| 66 | TRINITY_DN82822_c0_g1_i3  | Defense mechanisms                                 |
| 67 | TRINITY_DN75759_c5_g1_i4  | Signal transduction mechanisms; Defense mechanisms |
| 68 | TRINITY_DN82697_c3_g1_i5  | Defense mechanisms                                 |
| 69 | TRINITY_DN83643_c1_g2_i9  | Extracellular structures; Defense mechanisms       |

---

---

|    |                          |                                                    |
|----|--------------------------|----------------------------------------------------|
| 70 | TRINITY_DN73173_c0_g2_i1 | Defense mechanisms                                 |
| 71 | TRINITY_DN83643_c1_g1_i1 | Extracellular structures; Defense mechanisms       |
| 72 | TRINITY_DN85012_c5_g2_i2 | Defense mechanisms                                 |
| 73 | TRINITY_DN82618_c3_g2_i1 | Defense mechanisms                                 |
| 74 | TRINITY_DN72367_c0_g1_i1 | Defense mechanisms                                 |
| 75 | TRINITY_DN79060_c1_g1_i2 | Signal transduction mechanisms; Defense mechanisms |
| 76 | TRINITY_DN80924_c3_g3_i1 | Extracellular structures; Defense mechanisms       |
| 77 | TRINITY_DN85012_c4_g1_i4 | Signal transduction mechanisms; Defense mechanisms |
| 78 | TRINITY_DN65665_c0_g3_i1 | Signal transduction mechanisms; Defense mechanisms |
| 79 | TRINITY_DN81608_c4_g1_i3 | Defense mechanisms                                 |
| 80 | TRINITY_DN80820_c2_g2_i2 | Signal transduction mechanisms; Defense mechanisms |
| 81 | TRINITY_DN74013_c0_g1_i1 | Defense mechanisms                                 |
| 82 | TRINITY_DN82118_c3_g1_i2 | Defense mechanisms                                 |
| 83 | TRINITY_DN72121_c0_g4_i1 | Defense mechanisms                                 |
| 84 | TRINITY_DN79000_c0_g2_i2 | Defense mechanisms                                 |
| 85 | TRINITY_DN75743_c0_g2_i4 | Extracellular structures; Defense mechanisms       |
| 86 | TRINITY_DN80854_c2_g1_i4 | Defense mechanisms                                 |
| 87 | TRINITY_DN16636_c0_g1_i1 | Signal transduction mechanisms; Defense mechanisms |
| 88 | TRINITY_DN83043_c0_g1_i2 | Signal transduction mechanisms; Defense mechanisms |
| 89 | TRINITY_DN81172_c1_g2_i5 | Defense mechanisms                                 |
| 90 | TRINITY_DN70059_c0_g1_i1 | Defense mechanisms                                 |
| 91 | TRINITY_DN75738_c0_g1_i4 | Extracellular structures; Defense mechanisms       |
| 92 | TRINITY_DN85012_c3_g1_i1 | Defense mechanisms                                 |
| 93 | TRINITY_DN72609_c0_g1_i1 | Signal transduction mechanisms; Defense mechanisms |
| 94 | TRINITY_DN78614_c2_g4_i2 | Signal transduction mechanisms; Defense mechanisms |
| 95 | TRINITY_DN83852_c1_g3_i1 | Defense mechanisms                                 |

---

---

|     |                          |                                                    |
|-----|--------------------------|----------------------------------------------------|
| 96  | TRINITY_DN73069_c0_g2_i1 | Defense mechanisms                                 |
| 97  | TRINITY_DN80864_c2_g1_i2 | Signal transduction mechanisms; Defense mechanisms |
| 98  | TRINITY_DN75623_c3_g3_i1 | Signal transduction mechanisms; Defense mechanisms |
| 99  | TRINITY_DN83852_c1_g2_i3 | Extracellular structures; Defense mechanisms       |
| 100 | TRINITY_DN73094_c0_g1_i2 | Signal transduction mechanisms; Defense mechanisms |
| 101 | TRINITY_DN80924_c3_g5_i1 | Defense mechanisms                                 |
| 102 | TRINITY_DN83048_c1_g5_i1 | Defense mechanisms                                 |
| 103 | TRINITY_DN65896_c0_g1_i1 | Signal transduction mechanisms; Defense mechanisms |
| 104 | TRINITY_DN73077_c0_g1_i2 | Defense mechanisms                                 |
| 105 | TRINITY_DN76198_c0_g1_i1 | Signal transduction mechanisms; Defense mechanisms |
| 106 | TRINITY_DN80253_c0_g1_i3 | Signal transduction mechanisms; Defense mechanisms |
| 107 | TRINITY_DN78366_c0_g1_i5 | Signal transduction mechanisms; Defense mechanisms |
| 108 | TRINITY_DN83199_c0_g1_i4 | Extracellular structures; Defense mechanisms       |
| 109 | TRINITY_DN73173_c0_g1_i1 | Defense mechanisms                                 |
| 110 | TRINITY_DN77174_c0_g1_i1 | Extracellular structures; Defense mechanisms       |
| 111 | TRINITY_DN85012_c5_g1_i2 | Defense mechanisms                                 |
| 112 | TRINITY_DN75255_c0_g1_i1 | Extracellular structures; Defense mechanisms       |
| 113 | TRINITY_DN81998_c0_g2_i2 | Defense mechanisms                                 |
| 114 | TRINITY_DN82429_c0_g1_i4 | Signal transduction mechanisms; Defense mechanisms |
| 115 | TRINITY_DN57746_c0_g1_i1 | Signal transduction mechanisms; Defense mechanisms |
| 116 | TRINITY_DN80014_c0_g1_i4 | Defense mechanisms                                 |
| 117 | TRINITY_DN81258_c2_g1_i2 | Defense mechanisms                                 |
| 118 | TRINITY_DN72208_c0_g1_i1 | Signal transduction mechanisms; Defense mechanisms |
| 119 | TRINITY_DN75819_c0_g1_i1 | Defense mechanisms                                 |
| 120 | TRINITY_DN67666_c0_g1_i1 | Defense mechanisms                                 |
| 121 | TRINITY_DN82590_c1_g2_i1 | Defense mechanisms                                 |

---

---

|     |                          |                                                    |
|-----|--------------------------|----------------------------------------------------|
| 122 | TRINITY_DN80917_c2_g1_i2 | Defense mechanisms                                 |
| 123 | TRINITY_DN62754_c0_g1_i1 | Defense mechanisms                                 |
| 124 | TRINITY_DN81990_c1_g2_i3 | Signal transduction mechanisms; Defense mechanisms |
| 125 | TRINITY_DN74529_c0_g1_i1 | Extracellular structures; Defense mechanisms       |
| 126 | TRINITY_DN72451_c0_g1_i1 | Defense mechanisms                                 |
| 127 | TRINITY_DN80758_c0_g1_i4 | Signal transduction mechanisms; Defense mechanisms |
| 128 | TRINITY_DN68823_c0_g1_i1 | Signal transduction mechanisms; Defense mechanisms |
| 129 | TRINITY_DN81930_c5_g3_i2 | Signal transduction mechanisms; Defense mechanisms |
| 130 | TRINITY_DN82504_c0_g1_i3 | Defense mechanisms                                 |
| 131 | TRINITY_DN83170_c0_g1_i1 | Defense mechanisms                                 |
| 132 | TRINITY_DN80536_c0_g2_i2 | Defense mechanisms                                 |
| 133 | TRINITY_DN76908_c1_g1_i1 | Defense mechanisms                                 |
| 134 | TRINITY_DN82111_c0_g1_i6 | Signal transduction mechanisms; Defense mechanisms |
| 135 | TRINITY_DN78614_c2_g2_i2 | Defense mechanisms                                 |
| 136 | TRINITY_DN81990_c1_g4_i1 | Defense mechanisms                                 |
| 137 | TRINITY_DN76459_c0_g1_i5 | Defense mechanisms                                 |
| 138 | TRINITY_DN81568_c0_g1_i2 | Extracellular structures; Defense mechanisms       |
| 139 | TRINITY_DN73339_c0_g1_i1 | Extracellular structures; Defense mechanisms       |
| 140 | TRINITY_DN70324_c0_g1_i1 | Defense mechanisms                                 |
| 141 | TRINITY_DN74744_c3_g1_i1 | Signal transduction mechanisms; Defense mechanisms |
| 142 | TRINITY_DN76265_c0_g1_i3 | Signal transduction mechanisms; Defense mechanisms |
| 143 | TRINITY_DN81608_c4_g2_i1 | Signal transduction mechanisms; Defense mechanisms |
| 144 | TRINITY_DN76344_c3_g1_i1 | Defense mechanisms                                 |
| 145 | TRINITY_DN71223_c0_g2_i1 | Defense mechanisms                                 |
| 146 | TRINITY_DN84063_c1_g4_i2 | Signal transduction mechanisms; Defense mechanisms |
| 147 | TRINITY_DN87531_c0_g1_i1 | Signal transduction mechanisms; Defense mechanisms |

---

---

|     |                          |                                                      |
|-----|--------------------------|------------------------------------------------------|
| 148 | TRINITY_DN82458_c0_g2_i1 | Extracellular structures; Defense mechanisms         |
| 149 | TRINITY_DN81998_c1_g1_i8 | Defense mechanisms                                   |
| 150 | TRINITY_DN75743_c0_g1_i3 | Signal transduction mechanisms; Defense mechanisms   |
| 151 | TRINITY_DN76809_c0_g3_i1 | Extracellular structures; Defense mechanisms         |
| 152 | TRINITY_DN71026_c0_g1_i2 | Signal transduction mechanisms; Defense mechanisms   |
| 153 | TRINITY_DN79582_c0_g1_i1 | Extracellular structures; Defense mechanisms         |
| 154 | TRINITY_DN85012_c5_g3_i2 | General function prediction only; Defense mechanisms |
| 155 | TRINITY_DN78363_c0_g1_i5 | Defense mechanisms                                   |
| 156 | TRINITY_DN72121_c0_g1_i1 | Defense mechanisms                                   |
| 157 | TRINITY_DN75700_c0_g1_i6 | Extracellular structures; Defense mechanisms         |
| 158 | TRINITY_DN73339_c0_g2_i5 | Signal transduction mechanisms; Defense mechanisms   |
| 159 | TRINITY_DN76492_c1_g2_i1 | Extracellular structures; Defense mechanisms         |
| 160 | TRINITY_DN73738_c1_g1_i1 | Signal transduction mechanisms; Defense mechanisms   |
| 161 | TRINITY_DN76265_c2_g1_i4 | Defense mechanisms                                   |
| 162 | TRINITY_DN83526_c0_g1_i1 | Defense mechanisms                                   |

---

Note: Sequencing data that support the findings of this study have been deposited in the NCBI Sequence Read Archive (SRA) and are accessible under the SRA accession PRJNA588657.
